# Supplementary material
Source: ML conference proceedings conference paper supplement (https://openaccess.thecvf.com/content/ICCV_2019/html/Chen_Floor-SP_Inverse_CAD_ICCV_2019_paper.html)
Supplement: Supplementary file 2 [file Chen_Floor-SP_Inverse_CAD_ICCV_2019_supplemental.zip]

# Floor-SP: Inverse CAD for Floorplans by Sequential Room-wise Shortest Path Supplementary Material

Jiacheng Chen<sup>1</sup>      Chen Liu<sup>2</sup>      Jiaye Wu<sup>2</sup>      Yasutaka Furukawa<sup>1</sup>  
<sup>1</sup>Simon Fraser University      <sup>2</sup>Washington University in St. Louis  
{jca348, furukawa}@sfu.ca      {chenliu, jiaye.wu}@wustl.edu

Fig. 1 provides the full qualitative and quantitative evaluations of all the 94 test samples. The qualitative evaluations follow the format as Fig.6 of the main paper. The quantitative evaluations show 8 metrics (4 pairs of recall/precision) for each example. Please also refer to the supplementary video illustrating the room-wise coordinate descent. This supplementary document also provides the details of 1) Shortest-path problem reduction; 2) dominant direction approximation; and 3) Containment constraint satisfaction.

## 1. Shortest path problem reduction

Our objective has three factors: intra-room data term, inter-room consistency term, and model complexity term.

- The data-term  $E_{data}(L_i)$  is pixel-wise penalties summed over pixels along the loops, and hence, the reduction to the shortest path cost is straightforward for each loop. More concretely, every corner of a room is shared by two edges, thus contributes half of its cost to one edge:

$$\sum_{p \in \mathbb{C}(e)} \frac{\lambda_1}{2} E_{data}^{\mathcal{C}}(p).$$

The edge and interior penalties are summed over pixels along each edge without any changes:

$$\sum_{p \in \mathbb{E}(e)} [\lambda_2 E_{data}^{\mathcal{E}}(p) + \lambda_3 E_{data}^{\mathcal{I}}(p)].$$

- The model complexity  $E_{model}(L_i)$  is a constant penalized for each edge, which is simply added to the weight of an edge:

$$\lambda_6.$$

- The consistency term  $E_{consis}(\mathcal{L})$  is the number of pixels that are used by the corners (or edges) of all the loops. In the room-wise coordinate descent optimization where we fix the loops of all the other rooms, this term can be reduced to the shortest path cost. Without loss of regularity, suppose

we are optimizing  $L_1$ . If a pixel  $p$  of edge  $e$  in  $L_1$  is already used by other rooms, this pixel is imposed penalties regardless of  $L_i$ . Therefore, the shortest path problem considers only pixels that are not used by any other rooms:

$$\sum_{p \in \mathbb{C}(e)} \lambda_4 (1 - \mathbf{1}_{\mathcal{C}}(p, \mathcal{L} \setminus \{L_1\})) + \sum_{p \in \mathbb{E}(e)} \lambda_5 (1 - \mathbf{1}_{\mathcal{E}}(p, \mathcal{L} \setminus \{L_1\})).$$

$\mathbb{C}(e)$  is the two pixels at the two end-points of an edge ( $e$ ).  $\mathbb{E}(e)$  is a set of pixels along the edge containing the corners. In our implementation, we obtain  $\mathbb{E}(e)$  using Bresenham's line algorithm.

In summary, a single room-wise coordinate descent optimization step is reduced to a shortest path problem, where the weight of an edge is defined as follows.

$$\begin{aligned} & \sum_{p \in \mathbb{C}(e)} \frac{\lambda_1}{2} E_{data}^{\mathcal{C}}(p) + \\ & \sum_{p \in \mathbb{E}(e)} [\lambda_2 E_{data}^{\mathcal{E}}(p) + \lambda_3 E_{data}^{\mathcal{I}}(p)] + \\ & \sum_{p \in \mathbb{C}(e)} \lambda_4 (1 - \mathbf{1}_{\mathcal{C}}(p, \mathcal{L} \setminus \{L_1\})) + \\ & \sum_{p \in \mathbb{E}(e)} \lambda_5 (1 - \mathbf{1}_{\mathcal{E}}(p, \mathcal{L} \setminus \{L_1\})) + \lambda_6. \end{aligned}$$

## 2. Dominant direction approximation

Given per-pixel wall direction likelihoods in an increment of 10 degrees, we first extract 4 pairs or orthogonal directions greedily: Repeatedly finding the Manhattan frame whose sum of associated likelihood values are the maximum 4 times. Second, we assign two of the four Manhattan frames to each room: Given a room, based on the wall direction likelihoods for pixels inside the axis-aligned bounding box of the room, we find the top two Manhattan frames,

whose sum of associated direction likelihoods are the maximum. Third, for each (reference) room, we also allow the Manhattan frames of its neighboring rooms to be used in solving the shortest path problem. We define a room to be a neighbor, if its room boundary intersects with the bounding box of the reference room.

### 3. Containment constraint satisfaction

Identifying the *start-line* and the *start-edge* for each shortest path problem allows us to satisfy the containment constraint. The process involves two steps.

First, we enumerate possible room corners from a corner likelihood map by non-max suppression with a threshold 0.5. We keep only those inside the axis-aligned bounding box of the room under consideration (See Section 5 for the bounding box computation).

Second, we pick the corner (source) with the highest likelihood and find the closest corner (sink) to form a start-edge candidate. After making the edge parallel to the closest dominant direction by moving the sink corner, we check three conditions.

- If the perpendicular bisector of the start-edge hits the room mask ( $R_i$ ) on one side and does not hit the room mask on the other side.
- The start-edge candidate does not pass through the room mask.
- If more than 90% of the pixels on the start-edge candidate has more than 0.5 edge likelihoods.

If the process fails, we try the next closest sink corner. If all the sink corners fail, we try the source corner with the next highest corner likelihood. We repeat the process until success. We solve for the shortest path that connects the two endpoints of the start-edge while removing all the edges that cross *start-line* to enforce the path to *go around* the room mask.

| Processed Input                                                                     | Ground Truth                                                                        | FloorNet                                                                            | Ours<br>(w/o $E_{data}$ , $E_{consis}$ )                                            | Ours<br>(w/o $E_{consis}$ )                                                          | Ours                                                                                  |
|-------------------------------------------------------------------------------------|-------------------------------------------------------------------------------------|-------------------------------------------------------------------------------------|-------------------------------------------------------------------------------------|--------------------------------------------------------------------------------------|---------------------------------------------------------------------------------------|
| 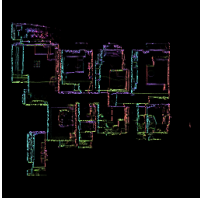   |    |    |    |    |    |
|                                                                                     |                                                                                     | 80.4/91.1, 84.1/94.6,<br>76.9/83.3, 23.1/25.0,                                      | 72.5/100.0, 68.3/89.6,<br>53.8/70.0, 0.0/0.0,                                       | 70.6/100.0, 66.7/91.3,<br>53.8/70.0, 0.0/0.0,                                        | 70.6/97.3, 69.8/95.7,<br>53.8/70.0, 0.0/0.0,                                          |
|    |    |    |    |    |    |
|                                                                                     |                                                                                     | 100.0/88.2, 100.0/86.4,<br>100.0/66.7, 50.0/33.3,                                   | 86.7/72.2, 68.4/61.9,<br>50.0/100.0, 0.0/0.0,                                       | 100.0/93.8, 100.0/100.0,<br>100.0/100.0, 100.0/100.0,                                | 100.0/93.8, 100.0/100.0,<br>100.0/100.0, 100.0/100.0,                                 |
|    |    |    |    |    |    |
|                                                                                     |                                                                                     | 70.6/60.0, 63.6/58.3,<br>80.0/80.0, 60.0/60.0,                                      | 70.6/57.1, 72.7/69.6,<br>60.0/100.0, 0.0/0.0,                                       | 76.5/52.0, 81.8/62.1,<br>60.0/100.0, 40.0/40.0,                                      | 88.2/65.2, 86.4/70.4,<br>100.0/100.0, 100.0/100.0,                                    |
|  |  |  |  |  |  |
|                                                                                     |                                                                                     | 88.9/94.1, 82.6/90.5,<br>83.3/100.0, 50.0/60.0,                                     | 94.4/85.0, 87.0/83.3,<br>83.3/100.0, 50.0/60.0,                                     | 94.4/100.0, 87.0/95.2,<br>83.3/100.0, 50.0/60.0,                                     | 94.4/100.0, 87.0/95.2,<br>83.3/100.0, 50.0/60.0,                                      |
|  |  |  |  |  |  |
|                                                                                     |                                                                                     | 67.4/96.9, 65.5/95.0,<br>75.0/100.0, 25.0/33.3,                                     | 60.9/87.5, 58.6/85.0,<br>33.3/66.7, 0.0/0.0,                                        | 84.8/100.0, 79.3/100.0,<br>75.0/90.0, 16.7/20.0,                                     | 82.6/100.0, 81.0/100.0,<br>75.0/90.0, 16.7/20.0,                                      |
|  |  |  |  |  |  |
|                                                                                     |                                                                                     | 92.3/100.0, 84.3/95.6,<br>83.3/90.9, 25.0/27.3,                                     | 74.4/87.9, 78.4/88.9,<br>50.0/54.5, 16.7/20.0,                                      | 87.2/97.1, 84.3/91.5,<br>91.7/91.7, 41.7/45.5,                                       | 87.2/100.0, 84.3/100.0,<br>83.3/90.9, 25.0/27.3,                                      |

Figure 1. Complete qualitative and quantitative evaluations on all the 94 testing examples. Note that FloorNet sometimes fails to produce any reconstruction, in which case, a blank figure is shown. The numbers for each example are recall/precision values for the four metrics (i.e., corner, edge, room, and room++) from left to right and top to bottom.

| Processed Input | Ground Truth | FloorNet                                         | Ours<br>(w/o $E_{data}$ , $E_{consis}$ )      | Ours<br>(w/o $E_{consis}$ )                      | Ours                                             |
|-----------------|--------------|--------------------------------------------------|-----------------------------------------------|--------------------------------------------------|--------------------------------------------------|
|                 |              |                                                  |                                               |                                                  |                                                  |
|                 |              | 8.0/50.0, 7.1/50.0,<br>25.0/100.0, 0.0/0.0,      | 44.0/52.4, 42.9/52.2,<br>75.0/75.0, 0.0/0.0,  | 56.0/66.7, 53.6/62.5,<br>25.0/50.0, 0.0/0.0,     | 68.0/94.4, 64.3/85.7,<br>50.0/50.0, 0.0/0.0,     |
|                 |              |                                                  |                                               |                                                  |                                                  |
|                 |              | 86.7/100.0, 84.5/100.0,<br>91.7/91.7, 66.7/66.7, | 73.3/93.6, 69.0/86.0,<br>25.0/60.0, 0.0/0.0,  | 66.7/100.0, 66.2/94.0,<br>83.3/90.9, 41.7/50.0,  | 70.0/100.0, 66.2/95.9,<br>58.3/87.5, 8.3/10.0,   |
|                 |              |                                                  |                                               |                                                  |                                                  |
|                 |              | 44.8/92.9, 38.9/87.5,<br>28.6/66.7, 0.0/0.0,     | 82.8/75.0, 75.0/65.9,<br>14.3/100.0, 0.0/0.0, | 65.5/95.0, 66.7/88.9,<br>42.9/42.9, 14.3/16.7,   | 72.4/95.5, 69.4/86.2,<br>42.9/42.9, 14.3/16.7,   |
|                 |              |                                                  |                                               |                                                  |                                                  |
|                 |              | 21.4/50.0, 5.9/16.7,<br>25.0/100.0, 0.0/0.0,     | 92.9/86.7, 94.1/100.0,<br>50.0/66.7, 0.0/0.0, | 92.9/100.0, 94.1/100.0,<br>50.0/66.7, 25.0/33.3, | 92.9/100.0, 94.1/100.0,<br>50.0/66.7, 25.0/33.3, |
|                 |              |                                                  |                                               |                                                  |                                                  |
|                 |              | 70.0/63.6, 58.3/53.8,<br>80.0/80.0, 40.0/40.0,   | 85.0/60.7, 87.5/61.8,<br>20.0/100.0, 0.0/0.0, | 80.0/84.2, 79.2/76.0,<br>100.0/83.3, 60.0/60.0,  | 70.0/73.7, 54.2/56.5,<br>100.0/100.0, 80.0/80.0, |
|                 |              |                                                  |                                               |                                                  |                                                  |
|                 |              | 39.1/60.0, 45.2/82.4,<br>25.0/66.7, 0.0/0.0,     | 87.0/54.1, 83.9/60.5,<br>12.5/50.0, 0.0/0.0,  | 95.7/73.3, 96.8/83.3,<br>87.5/87.5, 37.5/42.9,   | 91.3/65.6, 90.3/70.0,<br>87.5/87.5, 37.5/42.9,   |

Figure 1. More qualitative and quantitative evaluations.

| Processed Input                                                                     | Ground Truth                                                                        | FloorNet                                                                            | Ours<br>(w/o $E_{data}$ , $E_{consis}$ )                                            | Ours<br>(w/o $E_{consis}$ )                                                           | Ours                                                                                  |
|-------------------------------------------------------------------------------------|-------------------------------------------------------------------------------------|-------------------------------------------------------------------------------------|-------------------------------------------------------------------------------------|---------------------------------------------------------------------------------------|---------------------------------------------------------------------------------------|
| 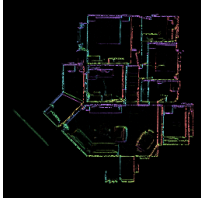   |    |    |    |    |    |
|                                                                                     |                                                                                     | 38.9/100.0, 40.9/94.7,<br>55.6/83.3, 11.1/16.7,                                     | 77.8/93.3, 75.0/89.2,<br>55.6/100.0, 11.1/14.3,                                     | 75.0/96.4, 77.3/97.1,<br>88.9/100.0, 77.8/87.5,                                       | 77.8/100.0, 72.7/97.0,<br>88.9/100.0, 77.8/87.5,                                      |
|    |    |    |    |    |    |
|                                                                                     |                                                                                     | 84.6/73.3, 81.2/72.2,<br>100.0/100.0, 100.0/100.0,                                  | 92.3/85.7, 81.2/76.5,<br>100.0/100.0, 50.0/50.0,                                    | 84.6/73.3, 87.5/77.8,<br>100.0/100.0, 50.0/50.0,                                      | 92.3/80.0, 68.8/61.1,<br>100.0/100.0, 50.0/50.0,                                      |
|    |    |    |    |    |    |
|                                                                                     |                                                                                     | 63.6/56.0, 71.4/64.5,<br>57.1/57.1, 14.3/14.3,                                      | 86.4/65.5, 78.6/57.9,<br>71.4/45.5, 28.6/25.0,                                      | 81.8/78.3, 75.0/70.0,<br>71.4/62.5, 28.6/25.0,                                        | 81.8/78.3, 75.0/70.0,<br>71.4/100.0, 28.6/25.0,                                       |
|  |  |  |  |  |  |
|                                                                                     |                                                                                     | 46.7/58.3, 36.8/53.8,<br>40.0/100.0, 20.0/50.0,                                     | 93.3/50.0, 89.5/50.0,<br>60.0/75.0, 0.0/0.0,                                        | 93.3/63.6, 89.5/60.7,<br>100.0/35.7, 60.0/50.0,                                       | 86.7/61.9, 78.9/57.7,<br>100.0/83.3, 60.0/50.0,                                       |
|  |  |  |  |  |  |
|                                                                                     |                                                                                     | 79.5/91.2, 74.5/83.3,<br>100.0/88.9, 50.0/44.4,                                     | 71.8/68.3, 72.3/69.4,<br>37.5/100.0, 12.5/12.5,                                     | 61.5/77.4, 63.8/75.0,<br>75.0/66.7, 25.0/25.0,                                        | 59.0/76.7, 61.7/72.5,<br>75.0/66.7, 25.0/25.0,                                        |
|  |  |  |  |  |  |
|                                                                                     |                                                                                     | 76.6/92.3, 82.1/97.9,<br>90.0/100.0, 70.0/77.8,                                     | 68.1/82.1, 67.9/79.2,<br>40.0/57.1, 0.0/0.0,                                        | 68.1/100.0, 71.4/95.2,<br>90.0/81.8, 70.0/70.0,                                       | 72.3/100.0, 71.4/95.2,<br>90.0/90.0, 70.0/70.0,                                       |

Figure 1. More qualitative and quantitative evaluations.

| Processed Input | Ground Truth | FloorNet                                           | Ours<br>(w/o $E_{data}$ , $E_{consis}$ )           | Ours<br>(w/o $E_{consis}$ )                         | Ours                                               |
|-----------------|--------------|----------------------------------------------------|----------------------------------------------------|-----------------------------------------------------|----------------------------------------------------|
|                 |              |                                                    |                                                    |                                                     |                                                    |
|                 |              | 75.0/80.0, 70.0/77.8,<br>80.0/100.0, 60.0/75.0,    | 100.0/76.2, 100.0/80.0,<br>80.0/80.0, 40.0/40.0,   | 100.0/94.1, 95.0/90.5,<br>100.0/100.0, 100.0/100.0, | 93.8/83.3, 95.0/86.4,<br>80.0/80.0, 60.0/60.0,     |
|                 |              |                                                    |                                                    |                                                     |                                                    |
|                 |              | 78.8/96.3, 81.0/100.0,<br>100.0/87.5, 71.4/62.5,   | 87.9/87.9, 92.9/90.7,<br>100.0/87.5, 42.9/37.5,    | 84.8/100.0, 81.0/100.0,<br>71.4/83.3, 0.0/0.0,      | 87.9/100.0, 92.9/100.0,<br>100.0/87.5, 71.4/62.5,  |
|                 |              |                                                    |                                                    |                                                     |                                                    |
|                 |              | 61.1/84.6, 52.2/80.0,<br>50.0/100.0, 16.7/33.3,    | 72.2/61.9, 69.6/61.5,<br>50.0/60.0, 16.7/20.0,     | 72.2/68.4, 69.6/69.6,<br>50.0/60.0, 16.7/20.0,      | 72.2/65.0, 69.6/66.7,<br>50.0/60.0, 16.7/20.0,     |
|                 |              |                                                    |                                                    |                                                     |                                                    |
|                 |              | 73.1/100.0, 74.2/100.0,<br>100.0/85.7, 66.7/57.1,  | 88.5/92.0, 71.0/68.8,<br>50.0/100.0, 0.0/0.0,      | 88.5/100.0, 87.1/100.0,<br>66.7/100.0, 0.0/0.0,     | 84.6/100.0, 80.6/96.2,<br>100.0/100.0, 83.3/83.3,  |
|                 |              |                                                    |                                                    |                                                     |                                                    |
|                 |              | 92.0/92.0, 87.1/93.1,<br>83.3/100.0, 50.0/60.0,    | 64.0/66.7, 58.1/60.0,<br>33.3/66.7, 0.0/0.0,       | 88.0/84.6, 87.1/84.4,<br>83.3/83.3, 50.0/50.0,      | 84.0/84.0, 83.9/83.9,<br>83.3/83.3, 50.0/50.0,     |
|                 |              |                                                    |                                                    |                                                     |                                                    |
|                 |              | 55.6/45.5, 60.0/50.0,<br>100.0/100.0, 100.0/100.0, | 55.6/50.0, 50.0/45.5,<br>100.0/100.0, 100.0/100.0, | 77.8/63.6, 60.0/50.0,<br>100.0/100.0, 100.0/100.0,  | 77.8/77.8, 60.0/60.0,<br>100.0/100.0, 100.0/100.0, |

Figure 1. More qualitative and quantitative evaluations.

| Processed Input                                                                     | Ground Truth                                                                        | FloorNet                                                                            | Ours<br>(w/o $E_{data}$ , $E_{consis}$ )                                            | Ours<br>(w/o $E_{consis}$ )                                                          | Ours                                                                                  |
|-------------------------------------------------------------------------------------|-------------------------------------------------------------------------------------|-------------------------------------------------------------------------------------|-------------------------------------------------------------------------------------|--------------------------------------------------------------------------------------|---------------------------------------------------------------------------------------|
|    |    |    |    |    |    |
|                                                                                     |                                                                                     | 45.8/73.3, 46.4/76.5,<br>60.0/100.0, 20.0/33.3,                                     | 83.3/83.3, 82.1/79.3,<br>100.0/71.4, 60.0/60.0,                                     | 75.0/81.8, 71.4/74.1,<br>60.0/100.0, 0.0/0.0,                                        | 79.2/95.0, 78.6/88.0,<br>100.0/83.3, 100.0/100.0,                                     |
|    |    |    |    |    |    |
|                                                                                     |                                                                                     | 44.1/100.0, 51.3/100.0,<br>50.0/100.0, 0.0/0.0,                                     | 67.6/92.0, 66.7/86.7,<br>0.0/0.0, 0.0/0.0,                                          | 58.8/100.0, 59.0/100.0,<br>50.0/75.0, 16.7/25.0,                                     | 58.8/100.0, 53.8/100.0,<br>50.0/75.0, 16.7/25.0,                                      |
|    |    |    |    |    |    |
|                                                                                     |                                                                                     | 70.6/70.6, 66.7/66.7,<br>100.0/100.0, 100.0/100.0,                                  | 94.1/72.7, 90.5/70.4,<br>100.0/100.0, 60.0/60.0,                                    | 94.1/84.2, 100.0/91.3,<br>100.0/100.0, 100.0/100.0,                                  | 94.1/84.2, 100.0/91.3,<br>100.0/100.0, 100.0/100.0,                                   |
|  |  |  |  |  |  |
|                                                                                     |                                                                                     | 66.7/70.0, 68.0/70.8,<br>100.0/100.0, 40.0/40.0,                                    | 81.0/60.7, 80.0/64.5,<br>100.0/83.3, 80.0/80.0,                                     | 81.0/89.5, 72.0/72.0,<br>100.0/100.0, 80.0/80.0,                                     | 81.0/89.5, 56.0/60.9,<br>100.0/100.0, 80.0/80.0,                                      |
|  |  |  |  |  |  |
|                                                                                     |                                                                                     | 30.0/100.0, 20.0/100.0,<br>16.7/100.0, 0.0/0.0,                                     | 90.0/58.1, 92.0/65.7,<br>83.3/71.4, 33.3/33.3,                                      | 90.0/85.7, 88.0/88.0,<br>83.3/83.3, 66.7/66.7,                                       | 90.0/78.3, 92.0/82.1,<br>83.3/71.4, 66.7/66.7,                                        |
|  |  |  |  |  |  |
|                                                                                     |                                                                                     | 50.0/61.5, 42.9/60.0,<br>33.3/66.7, 16.7/33.3,                                      | 87.5/58.3, 81.0/56.7,<br>50.0/75.0, 0.0/0.0,                                        | 100.0/84.2, 85.7/75.0,<br>50.0/100.0, 16.7/16.7,                                     | 87.5/63.6, 71.4/57.7,<br>66.7/100.0, 33.3/33.3,                                       |

Figure 1. More qualitative and quantitative evaluations.

| Processed Input | Ground Truth | FloorNet                                         | Ours<br>(w/o $E_{data}$ , $E_{consis}$ )       | Ours<br>(w/o $E_{consis}$ )                          | Ours                                                 |
|-----------------|--------------|--------------------------------------------------|------------------------------------------------|------------------------------------------------------|------------------------------------------------------|
|                 |              |                                                  |                                                |                                                      |                                                      |
|                 |              | 34.8/72.7, 33.3/76.9,<br>42.9/100.0, 14.3/33.3,  | 65.2/65.2, 60.0/58.1,<br>57.1/80.0, 0.0/0.0,   | 65.2/68.2, 63.3/63.3,<br>85.7/85.7, 28.6/28.6,       | 65.2/68.2, 63.3/65.5,<br>85.7/85.7, 28.6/28.6,       |
|                 |              |                                                  |                                                |                                                      |                                                      |
|                 |              | 0.0/0.0, 0.0/0.0,<br>0.0/0.0, 0.0/0.0,           | 54.5/75.0, 58.3/87.5,<br>50.0/100.0, 0.0/0.0,  | 81.8/100.0, 83.3/100.0,<br>100.0/100.0, 100.0/100.0, | 81.8/100.0, 83.3/100.0,<br>100.0/100.0, 100.0/100.0, |
|                 |              |                                                  |                                                |                                                      |                                                      |
|                 |              | 65.5/100.0, 64.7/95.7,<br>66.7/80.0, 16.7/20.0,  | 75.9/75.9, 70.6/66.7,<br>66.7/80.0, 0.0/0.0,   | 75.9/88.0, 70.6/75.0,<br>66.7/80.0, 0.0/0.0,         | 75.9/91.7, 73.5/80.6,<br>83.3/71.4, 33.3/28.6,       |
|                 |              |                                                  |                                                |                                                      |                                                      |
|                 |              | 64.7/55.0, 61.9/59.1,<br>60.0/100.0, 0.0/0.0,    | 88.2/65.2, 85.7/64.3,<br>60.0/50.0, 0.0/0.0,   | 88.2/68.2, 90.5/70.4,<br>60.0/42.9, 0.0/0.0,         | 88.2/71.4, 90.5/73.1,<br>60.0/42.9, 0.0/0.0,         |
|                 |              |                                                  |                                                |                                                      |                                                      |
|                 |              | 64.0/88.9, 70.0/91.3,<br>83.3/83.3, 50.0/50.0,   | 96.0/80.0, 100.0/83.3,<br>50.0/60.0, 0.0/0.0,  | 96.0/100.0, 100.0/96.8,<br>100.0/85.7, 83.3/71.4,    | 96.0/100.0, 100.0/100.0,<br>100.0/85.7, 83.3/71.4,   |
|                 |              |                                                  |                                                |                                                      |                                                      |
|                 |              | 95.7/95.7, 93.3/90.3,<br>100.0/88.9, 100.0/88.9, | 91.3/95.5, 90.0/90.0,<br>87.5/87.5, 75.0/75.0, | 91.3/95.5, 80.0/82.8,<br>100.0/100.0, 100.0/100.0,   | 91.3/95.5, 80.0/82.8,<br>100.0/100.0, 100.0/100.0,   |

Figure 1. More qualitative and quantitative evaluations.

| Processed Input                                                                     | Ground Truth                                                                        | FloorNet                                                                            | Ours<br>(w/o $E_{data}$ , $E_{consis}$ )                                            | Ours<br>(w/o $E_{consis}$ )                                                          | Ours                                                                                  |
|-------------------------------------------------------------------------------------|-------------------------------------------------------------------------------------|-------------------------------------------------------------------------------------|-------------------------------------------------------------------------------------|--------------------------------------------------------------------------------------|---------------------------------------------------------------------------------------|
|    |    |    |    |    |    |
|                                                                                     |                                                                                     | 57.9/68.8, 60.0/83.3,<br>42.9/100.0, 14.3/33.3,                                     | 73.7/48.3, 72.0/52.9,<br>28.6/100.0, 0.0/0.0,                                       | 89.5/81.0, 88.0/84.6,<br>42.9/100.0, 14.3/20.0,                                      | 84.2/69.6, 76.0/67.9,<br>42.9/100.0, 14.3/20.0,                                       |
|    |    |    |    |    |    |
|                                                                                     |                                                                                     | 52.0/86.7, 62.5/100.0,<br>71.4/83.3, 42.9/50.0,                                     | 92.0/82.1, 93.8/88.2,<br>85.7/75.0, 14.3/12.5,                                      | 88.0/100.0, 93.8/100.0,<br>85.7/75.0, 42.9/37.5,                                     | 88.0/100.0, 90.6/100.0,<br>85.7/75.0, 42.9/37.5,                                      |
|    |    |    |    |    |    |
|                                                                                     |                                                                                     | 48.4/88.2, 55.6/100.0,<br>33.3/66.7, 0.0/0.0,                                       | 67.7/70.0, 63.9/67.6,<br>16.7/50.0, 0.0/0.0,                                        | 64.5/80.0, 72.2/89.7,<br>50.0/100.0, 0.0/0.0,                                        | 74.2/95.8, 75.0/96.4,<br>83.3/100.0, 50.0/60.0,                                       |
|  |  |  |  |  |  |
|                                                                                     |                                                                                     | 86.8/100.0, 88.9/100.0,<br>100.0/77.8, 42.9/33.3,                                   | 89.5/100.0, 86.7/97.5,<br>57.1/57.1, 14.3/12.5,                                     | 89.5/100.0, 86.7/100.0,<br>85.7/75.0, 28.6/25.0,                                     | 86.8/100.0, 86.7/100.0,<br>71.4/62.5, 14.3/12.5,                                      |
|  |  |  |  |  |  |
|                                                                                     |                                                                                     | 37.0/100.0, 37.0/100.0,<br>33.3/75.0, 0.0/0.0,                                      | 71.7/100.0, 74.1/100.0,<br>33.3/75.0, 0.0/0.0,                                      | 73.9/100.0, 75.9/100.0,<br>100.0/100.0, 100.0/100.0,                                 | 73.9/100.0, 74.1/100.0,<br>100.0/100.0, 100.0/100.0,                                  |
|  |  |  |  |  |  |
|                                                                                     |                                                                                     | 80.0/100.0, 84.6/100.0,<br>81.8/75.0, 36.4/33.3,                                    | 85.0/97.1, 90.4/92.2,<br>45.5/71.4, 0.0/0.0,                                        | 77.5/100.0, 82.7/100.0,<br>81.8/100.0, 45.5/45.5,                                    | 75.0/100.0, 82.7/100.0,<br>90.9/90.9, 36.4/36.4,                                      |

Figure 1. More qualitative and quantitative evaluations.

| Processed Input                                                                                                                                                                       | Ground Truth | FloorNet | Ours<br>(w/o $E_{data}$ , $E_{consis}$ ) | Ours<br>(w/o $E_{consis}$ ) | Ours |
|---------------------------------------------------------------------------------------------------------------------------------------------------------------------------------------|--------------|----------|------------------------------------------|-----------------------------|------|
|                                                                                                                                                                                       |              |          |                                          |                             |      |
| 88.9/100.0, 87.0/100.0, 100.0/100.0, 100.0/100.0, 100.0/100.0, 100.0/100.0, 100.0/100.0, 100.0/100.0, 100.0/100.0,                                                                    |              |          |                                          |                             |      |
|                                                                                                                                                                                       |              |          |                                          |                             |      |
| 63.6/58.3, 64.3/69.2, 25.0/50.0, 0.0/0.0, 81.8/64.3, 85.7/75.0, 50.0/66.7, 25.0/33.3, 100.0/84.6, 100.0/87.5, 100.0/100.0, 100.0/100.0, 100.0/100.0, 100.0/100.0,                     |              |          |                                          |                             |      |
|                                                                                                                                                                                       |              |          |                                          |                             |      |
| 92.9/83.9, 92.1/92.1, 80.0/100.0, 20.0/25.0, 100.0/68.3, 97.4/77.1, 30.0/100.0, 0.0/0.0, 100.0/90.3, 97.4/97.4, 80.0/100.0, 20.0/25.0, 100.0/93.3, 97.4/100.0, 80.0/100.0, 20.0/25.0, |              |          |                                          |                             |      |
|                                                                                                                                                                                       |              |          |                                          |                             |      |
| 47.1/72.7, 54.5/100.0, 16.7/50.0, 0.0/0.0, 64.7/39.3, 72.7/48.5, 16.7/50.0, 0.0/0.0, 64.7/52.4, 72.7/61.5, 33.3/66.7, 0.0/0.0, 58.8/47.6, 68.2/55.6, 66.7/66.7, 0.0/0.0,              |              |          |                                          |                             |      |
|                                                                                                                                                                                       |              |          |                                          |                             |      |
| 42.3/100.0, 40.6/100.0, 28.6/100.0, 0.0/0.0, 61.5/80.0, 62.5/74.1, 57.1/57.1, 0.0/0.0, 65.4/85.0, 62.5/76.9, 57.1/57.1, 0.0/0.0, 65.4/85.0, 62.5/76.9, 57.1/57.1, 0.0/0.0,            |              |          |                                          |                             |      |
|                                                                                                                                                                                       |              |          |                                          |                             |      |
| 87.2/100.0, 87.7/98.0, 90.9/83.3, 54.5/50.0, 85.1/100.0, 87.7/100.0, 90.9/90.9, 63.6/63.6, 74.5/97.2, 77.2/91.7, 90.9/90.9, 63.6/63.6, 74.5/97.2, 77.2/91.7, 90.9/90.9, 63.6/63.6,    |              |          |                                          |                             |      |

Figure 1. More qualitative and quantitative evaluations.

| Processed Input | Ground Truth | FloorNet                                           | Ours<br>(w/o $E_{data}$ , $E_{consis}$ )         | Ours<br>(w/o $E_{consis}$ )                       | Ours                                              |
|-----------------|--------------|----------------------------------------------------|--------------------------------------------------|---------------------------------------------------|---------------------------------------------------|
|                 |              |                                                    |                                                  |                                                   |                                                   |
|                 |              | 96.6/100.0, 94.3/100.0,<br>85.7/100.0, 57.1/66.7,  | 79.3/95.8, 77.1/93.1,<br>57.1/100.0, 0.0/0.0,    | 86.2/96.2, 85.7/93.8,<br>85.7/100.0, 57.1/66.7,   | 86.2/96.2, 85.7/96.8,<br>85.7/100.0, 57.1/66.7,   |
|                 |              |                                                    |                                                  |                                                   |                                                   |
|                 |              | 90.3/100.0, 92.1/100.0,<br>100.0/88.9, 75.0/66.7,  | 90.3/100.0, 89.5/94.4,<br>100.0/88.9, 75.0/66.7, | 90.3/100.0, 86.8/94.3,<br>100.0/88.9, 75.0/66.7,  | 90.3/100.0, 86.8/97.1,<br>100.0/88.9, 75.0/66.7,  |
|                 |              |                                                    |                                                  |                                                   |                                                   |
|                 |              | 100.0/100.0, 90.5/100.0,<br>87.5/100.0, 50.0/57.1, | 96.8/100.0, 85.7/100.0,<br>75.0/85.7, 25.0/28.6, | 93.5/100.0, 85.7/100.0,<br>75.0/85.7, 25.0/28.6,  | 96.8/100.0, 90.5/100.0,<br>87.5/100.0, 50.0/57.1, |
|                 |              |                                                    |                                                  |                                                   |                                                   |
|                 |              | 100.0/96.6, 100.0/89.5,<br>100.0/70.0, 42.9/30.0,  | 78.6/88.0, 76.5/81.2,<br>85.7/85.7, 42.9/42.9,   | 89.3/96.2, 82.4/87.5,<br>85.7/85.7, 42.9/42.9,    | 78.6/95.7, 70.6/80.0,<br>85.7/85.7, 42.9/42.9,    |
|                 |              |                                                    |                                                  |                                                   |                                                   |
|                 |              | 83.3/100.0, 83.3/100.0,<br>100.0/100.0, 66.7/66.7, | 70.8/85.0, 73.3/81.5,<br>66.7/66.7, 0.0/0.0,     | 83.3/100.0, 86.7/96.3,<br>100.0/100.0, 66.7/66.7, | 83.3/100.0, 86.7/96.3,<br>100.0/100.0, 66.7/66.7, |
|                 |              |                                                    |                                                  |                                                   |                                                   |
|                 |              | 93.5/100.0, 94.6/100.0,<br>100.0/85.7, 42.9/42.9,  | 90.3/100.0, 91.9/100.0,<br>50.0/60.0, 0.0/0.0,   | 90.3/100.0, 91.9/100.0,<br>83.3/71.4, 28.6/28.6,  | 87.1/100.0, 89.2/100.0,<br>83.3/71.4, 28.6/28.6,  |

Figure 1. More qualitative and quantitative evaluations.

| Processed Input                                                                     | Ground Truth                                                                        | FloorNet                                                                                            | Ours<br>(w/o $E_{data}$ , $E_{consis}$ )                                            | Ours<br>(w/o $E_{consis}$ )                                                          | Ours                                                                                  |
|-------------------------------------------------------------------------------------|-------------------------------------------------------------------------------------|-----------------------------------------------------------------------------------------------------|-------------------------------------------------------------------------------------|--------------------------------------------------------------------------------------|---------------------------------------------------------------------------------------|
| 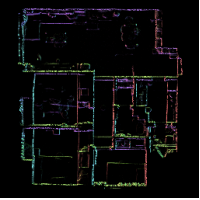   |    |                    |    |    |    |
|                                                                                     |                                                                                     | 100.0/93.5, 100.0/92.1,<br>100.0/87.5, 100.0/87.5,                                                  | 69.0/71.4, 71.4/71.4,<br>57.1/80.0, 28.6/28.6,                                      | 96.6/93.3, 94.3/89.2,<br>85.7/85.7, 28.6/28.6,                                       | 86.2/92.6, 82.9/85.3,<br>85.7/85.7, 28.6/28.6,                                        |
|    |    |                    |    |    |    |
|                                                                                     |                                                                                     | 67.5/100.0, 72.5/100.0,<br>81.8/100.0, 45.5/55.6,                                                   | 67.5/100.0, 74.5/100.0,<br>27.3/33.3, 0.0/0.0,                                      | 60.0/100.0, 68.6/100.0,<br>63.6/77.8, 9.1/11.1,                                      | 65.0/100.0, 72.5/100.0,<br>63.6/77.8, 9.1/11.1,                                       |
|    |    |                    |    |    |    |
|                                                                                     |                                                                                     | 82.8/77.4, 84.2/86.5,<br>70.0/100.0, 20.0/28.6,                                                     | 69.0/74.1, 68.4/78.8,<br>30.0/75.0, 0.0/0.0,                                        | 58.6/73.9, 57.9/75.9,<br>50.0/83.3, 20.0/33.3,                                       | 58.6/73.9, 57.9/78.6,<br>40.0/66.7, 0.0/0.0,                                          |
|  |  |                  |  |  |  |
|                                                                                     |                                                                                     | 83.0/100.0, 84.2/100.0,<br>100.0/91.7, 81.8/75.0,                                                   | 83.0/100.0, 84.2/98.0,<br>100.0/91.7, 81.8/81.8,                                    | 87.2/100.0, 80.7/90.2,<br>100.0/100.0, 100.0/100.0,                                  | 87.2/100.0, 78.9/100.0,<br>100.0/100.0, 100.0/100.0,                                  |
|  |  |                  |  |  |  |
|                                                                                     |                                                                                     | 100.0/97.4, 100.0/93.9,<br>100.0/83.3, 60.0/50.0,                                                   | 81.1/88.2, 78.3/87.8,<br>70.0/87.5, 10.0/12.5,                                      | 94.6/97.2, 95.7/95.7,<br>100.0/100.0, 100.0/100.0,                                   | 100.0/100.0, 100.0/97.9,<br>100.0/100.0, 100.0/100.0,                                 |
|  |  |                  |  |  |  |
|                                                                                     |                                                                                     | 100.0/100.0, 100.0/96.6, 100.0/95.7, 100.0/87.5,<br>100.0/87.5, 100.0/87.5, 100.0/87.5, 100.0/87.5, | 100.0/100.0, 100.0/93.3,<br>100.0/87.5, 100.0/87.5,                                 | 100.0/100.0, 100.0/93.3,<br>100.0/87.5, 100.0/87.5,                                  | 100.0/100.0, 100.0/93.3,<br>100.0/87.5, 100.0/87.5,                                   |

Figure 1. More qualitative and quantitative evaluations.

| Processed Input                                                                     | Ground Truth                                                                        | FloorNet                                                                            | Ours<br>(w/o $E_{data}$ , $E_{consis}$ )                                            | Ours<br>(w/o $E_{consis}$ )                                                           | Ours                                                                                  |
|-------------------------------------------------------------------------------------|-------------------------------------------------------------------------------------|-------------------------------------------------------------------------------------|-------------------------------------------------------------------------------------|---------------------------------------------------------------------------------------|---------------------------------------------------------------------------------------|
| 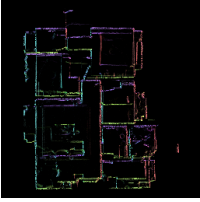   |    |    |    |    |    |
|                                                                                     |                                                                                     | 83.3/96.8, 81.4/94.6,<br>87.5/100.0, 62.5/71.4,                                     | 88.9/100.0, 83.7/97.3,<br>100.0/100.0, 62.5/62.5,                                   | 80.6/93.5, 79.1/85.0,<br>100.0/100.0, 100.0/100.0,                                    | 66.7/100.0, 69.8/90.9,<br>100.0/100.0, 100.0/100.0,                                   |
|    |    |    |    |    |    |
|                                                                                     |                                                                                     | 77.8/100.0, 84.4/100.0,<br>100.0/83.3, 60.0/50.0,                                   | 66.7/90.0, 68.8/91.7,<br>100.0/100.0, 60.0/60.0,                                    | 70.4/95.0, 75.0/100.0,<br>100.0/100.0, 60.0/60.0,                                     | 70.4/95.0, 78.1/100.0,<br>100.0/100.0, 60.0/60.0,                                     |
|    |    |    |    |    |    |
|                                                                                     |                                                                                     | 100.0/94.4, 100.0/91.7,<br>100.0/85.7, 66.7/57.1,                                   | 100.0/73.9, 100.0/73.3,<br>83.3/100.0, 16.7/14.3,                                   | 100.0/94.4, 100.0/84.6,<br>100.0/85.7, 66.7/57.1,                                     | 100.0/94.4, 100.0/88.0,<br>83.3/71.4, 16.7/14.3,                                      |
|  |  |  |  |  |  |
|                                                                                     |                                                                                     | 100.0/100.0, 100.0/100.0,<br>100.0/100.0, 100.0/100.0,                              | 100.0/100.0, 100.0/100.0,<br>100.0/87.5, 71.4/71.4,                                 | 100.0/100.0, 100.0/100.0,<br>100.0/100.0, 100.0/100.0,                                | 100.0/100.0, 100.0/100.0,<br>100.0/100.0, 100.0/100.0,                                |
|  |  |  |  |  |  |
|                                                                                     |                                                                                     | 81.8/100.0, 84.6/100.0,<br>100.0/100.0, 85.7/85.7,                                  | 78.8/92.9, 82.1/94.1,<br>100.0/100.0, 85.7/85.7,                                    | 87.9/96.7, 84.6/86.8,<br>100.0/87.5, 85.7/75.0,                                       | 87.9/96.7, 84.6/86.8,<br>100.0/87.5, 85.7/75.0,                                       |
|  |  |  |  |  |  |
|                                                                                     |                                                                                     | 86.7/96.3, 94.7/100.0,<br>77.8/87.5, 33.3/37.5,                                     | 70.0/72.4, 78.9/83.3,<br>55.6/83.3, 11.1/12.5,                                      | 73.3/91.7, 81.6/100.0,<br>88.9/100.0, 66.7/75.0,                                      | 73.3/91.7, 78.9/96.8,<br>88.9/100.0, 66.7/75.0,                                       |

Figure 1. More qualitative and quantitative evaluations.

| Processed Input                                                                     | Ground Truth                                                                        | FloorNet                                                                            | Ours<br>(w/o $E_{data}$ , $E_{consis}$ )                                            | Ours<br>(w/o $E_{consis}$ )                                                          | Ours                                                                                  |
|-------------------------------------------------------------------------------------|-------------------------------------------------------------------------------------|-------------------------------------------------------------------------------------|-------------------------------------------------------------------------------------|--------------------------------------------------------------------------------------|---------------------------------------------------------------------------------------|
|    |    |    |    |    |    |
|                                                                                     |                                                                                     | 91.7/91.7, 90.0/90.0,<br>85.7/85.7, 28.6/28.6,                                      | 100.0/80.0, 100.0/78.9,<br>85.7/75.0, 57.1/50.0,                                    | 100.0/88.9, 86.7/76.5,<br>100.0/87.5, 100.0/87.5,                                    | 100.0/85.7, 100.0/85.7,<br>100.0/87.5, 100.0/87.5,                                    |
|    |    |    |    |    |    |
|                                                                                     |                                                                                     | 86.7/100.0, 86.1/100.0,<br>100.0/100.0, 100.0/100.0,                                | 76.7/92.0, 80.6/90.6,<br>85.7/75.0, 57.1/57.1,                                      | 76.7/100.0, 77.8/93.3,<br>100.0/100.0, 100.0/100.0,                                  | 76.7/100.0, 80.6/96.7,<br>100.0/100.0, 100.0/100.0,                                   |
|    |    |    |    |    |    |
|                                                                                     |                                                                                     | 96.7/90.6, 94.6/89.7,<br>100.0/100.0, 100.0/100.0,                                  | 83.3/83.3, 83.8/81.6,<br>62.5/100.0, 12.5/14.3,                                     | 93.3/87.5, 89.2/84.6,<br>87.5/87.5, 37.5/42.9,                                       | 93.3/87.5, 89.2/84.6,<br>87.5/87.5, 37.5/42.9,                                        |
|  |  |  |  |  |  |
|                                                                                     |                                                                                     | 85.2/95.8, 88.6/96.9,<br>100.0/100.0, 100.0/100.0,                                  | 81.5/88.0, 82.9/87.9,<br>44.4/66.7, 11.1/12.5,                                      | 81.5/100.0, 82.9/96.7,<br>77.8/87.5, 33.3/37.5,                                      | 81.5/100.0, 82.9/96.7,<br>77.8/87.5, 33.3/37.5,                                       |
|  |  |  |  |  |  |
|                                                                                     |                                                                                     | 90.0/100.0, 92.0/100.0,<br>83.3/100.0, 33.3/40.0,                                   | 90.0/94.7, 92.0/92.0,<br>33.3/33.3, 0.0/0.0,                                        | 95.0/100.0, 100.0/96.2,<br>66.7/66.7, 16.7/16.7,                                     | 100.0/100.0, 100.0/96.2,<br>66.7/66.7, 16.7/16.7,                                     |
|  |  |  |  |  |  |
|                                                                                     |                                                                                     | 96.6/93.3, 97.2/94.6,<br>87.5/87.5, 62.5/62.5,                                      | 82.8/82.8, 86.1/81.6,<br>62.5/83.3, 0.0/0.0,                                        | 86.2/89.3, 83.3/85.7,<br>87.5/87.5, 62.5/62.5,                                       | 86.2/89.3, 86.1/88.6,<br>87.5/87.5, 62.5/62.5,                                        |

Figure 1. More qualitative and quantitative evaluations.

| Processed Input | Ground Truth | FloorNet                                          | Ours<br>(w/o $E_{data}$ , $E_{consis}$ )         | Ours<br>(w/o $E_{consis}$ )                      | Ours                                             |
|-----------------|--------------|---------------------------------------------------|--------------------------------------------------|--------------------------------------------------|--------------------------------------------------|
|                 |              |                                                   |                                                  |                                                  |                                                  |
|                 |              | 91.3/95.5, 96.7/96.7,<br>100.0/77.8, 42.9/33.3,   | 87.0/90.9, 93.3/90.3,<br>71.4/62.5, 0.0/0.0,     | 87.0/100.0, 93.3/96.6,<br>71.4/62.5, 0.0/0.0,    | 87.0/100.0, 90.0/93.1,<br>71.4/62.5, 0.0/0.0,    |
|                 |              |                                                   |                                                  |                                                  |                                                  |
|                 |              | 72.0/85.7, 73.3/88.0,<br>66.7/80.0, 0.0/0.0,      | 84.0/72.4, 80.0/66.7,<br>33.3/50.0, 0.0/0.0,     | 84.0/77.8, 83.3/73.5,<br>100.0/75.0, 100.0/75.0, | 84.0/75.0, 80.0/68.6,<br>100.0/75.0, 100.0/75.0, |
|                 |              |                                                   |                                                  |                                                  |                                                  |
|                 |              | 73.9/100.0, 70.4/97.4,<br>88.9/88.9, 44.4/44.4,   | 67.4/91.2, 63.0/79.1,<br>11.1/16.7, 0.0/0.0,     | 78.3/100.0, 72.2/88.6,<br>55.6/62.5, 11.1/10.0,  | 76.1/100.0, 70.4/86.4,<br>55.6/62.5, 11.1/10.0,  |
|                 |              |                                                   |                                                  |                                                  |                                                  |
|                 |              | 88.9/94.1, 88.0/95.7,<br>87.5/100.0, 12.5/14.3,   | 100.0/81.8, 100.0/83.3,<br>62.5/55.6, 12.5/12.5, | 100.0/90.0, 96.0/82.8,<br>62.5/62.5, 12.5/12.5,  | 100.0/90.0, 96.0/82.8,<br>62.5/62.5, 12.5/12.5,  |
|                 |              |                                                   |                                                  |                                                  |                                                  |
|                 |              | 97.8/100.0, 94.4/100.0,<br>100.0/90.0, 88.9/80.0, | 84.8/100.0, 79.6/100.0,<br>77.8/77.8, 11.1/11.1, | 84.8/100.0, 81.5/97.8,<br>77.8/63.6, 44.4/40.0,  | 89.1/100.0, 85.2/100.0,<br>88.9/80.0, 44.4/40.0, |
|                 |              |                                                   |                                                  |                                                  |                                                  |
|                 |              | 72.4/100.0, 69.4/100.0,<br>50.0/100.0, 12.5/25.0, | 86.2/96.2, 86.1/91.2,<br>87.5/87.5, 50.0/50.0,   | 79.3/85.2, 83.3/88.2,<br>87.5/87.5, 50.0/50.0,   | 79.3/82.1, 83.3/85.7,<br>87.5/87.5, 50.0/50.0,   |

Figure 1. More qualitative and quantitative evaluations.

| Processed Input                                                                     | Ground Truth                                                                        | FloorNet                                                                            | Ours<br>(w/o $E_{data}$ , $E_{consis}$ )                                            | Ours<br>(w/o $E_{consis}$ )                                                           | Ours                                                                                  |
|-------------------------------------------------------------------------------------|-------------------------------------------------------------------------------------|-------------------------------------------------------------------------------------|-------------------------------------------------------------------------------------|---------------------------------------------------------------------------------------|---------------------------------------------------------------------------------------|
| 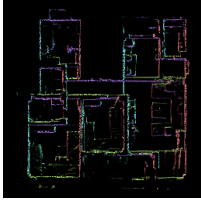   |    |    |    |    |    |
|                                                                                     |                                                                                     | 64.9/100.0, 68.9/100.0,<br>55.6/71.4, 0.0/0.0,                                      | 73.0/90.0, 73.3/86.8,<br>66.7/75.0, 22.2/25.0,                                      | 70.3/81.2, 73.3/82.5,<br>88.9/88.9, 55.6/55.6,                                        | 73.0/87.1, 80.0/90.0,<br>77.8/77.8, 33.3/33.3,                                        |
|    |    |    |    |    |    |
|                                                                                     |                                                                                     | 71.4/95.2, 76.5/100.0,<br>85.7/100.0, 42.9/50.0,                                    | 89.3/80.6, 88.2/81.1,<br>71.4/62.5, 0.0/0.0,                                        | 89.3/86.2, 82.4/73.7,<br>71.4/55.6, 0.0/0.0,                                          | 75.0/77.8, 76.5/72.2,<br>71.4/55.6, 0.0/0.0,                                          |
|    |    |    |    |    |    |
|                                                                                     |                                                                                     | 100.0/97.4, 97.8/91.7,<br>100.0/81.8, 77.8/63.6,                                    | 94.6/89.7, 95.6/86.0,<br>88.9/80.0, 77.8/77.8,                                      | 89.2/100.0, 86.7/92.9,<br>88.9/88.9, 44.4/44.4,                                       | 89.2/97.1, 86.7/88.6,<br>100.0/100.0, 100.0/100.0,                                    |
|  |  |  |  |  |  |
|                                                                                     |                                                                                     | 88.9/100.0, 87.9/100.0,<br>85.7/85.7, 42.9/42.9,                                    | 96.3/89.7, 93.9/83.8,<br>100.0/87.5, 57.1/57.1,                                     | 92.6/96.2, 90.9/88.2,<br>100.0/100.0, 85.7/85.7,                                      | 92.6/96.2, 90.9/88.2,<br>100.0/100.0, 85.7/85.7,                                      |
|  |  |  |  |  |  |
|                                                                                     |                                                                                     | 88.6/100.0, 90.7/100.0,<br>100.0/87.5, 85.7/75.0,                                   | 88.6/100.0, 90.7/100.0,<br>71.4/62.5, 28.6/25.0,                                    | 88.6/100.0, 90.7/100.0,<br>85.7/75.0, 71.4/62.5,                                      | 88.6/100.0, 90.7/100.0,<br>85.7/75.0, 71.4/62.5,                                      |
|  |  |  |  |  |  |
|                                                                                     |                                                                                     | 0.0/0.0, 0.0/0.0,<br>0.0/0.0, 0.0/0.0,                                              | 95.7/91.7, 92.6/89.3,<br>60.0/42.9, 0.0/0.0,                                        | 91.3/100.0, 92.6/92.6,<br>80.0/57.1, 20.0/14.3,                                       | 95.7/100.0, 96.3/96.3,<br>80.0/57.1, 20.0/14.3,                                       |

Figure 1. More qualitative and quantitative evaluations.

| Processed Input | Ground Truth | FloorNet                                        | Ours<br>(w/o $E_{data}$ , $E_{consis}$ )      | Ours<br>(w/o $E_{consis}$ )                        | Ours                                              |
|-----------------|--------------|-------------------------------------------------|-----------------------------------------------|----------------------------------------------------|---------------------------------------------------|
|                 |              |                                                 |                                               |                                                    |                                                   |
|                 |              | 90.9/100.0, 92.6/100.0, 100.0/100.0, 66.7/66.7, | 100.0/95.7, 100.0/96.4, 83.3/83.3, 33.3/33.3, | 81.8/100.0, 77.8/87.5, 83.3/83.3, 33.3/33.3,       | 81.8/100.0, 77.8/87.5, 83.3/83.3, 33.3/33.3,      |
|                 |              |                                                 |                                               |                                                    |                                                   |
|                 |              | 100.0/94.4, 100.0/91.3, 100.0/83.3, 40.0/33.3,  | 76.5/81.2, 81.0/81.0, 100.0/100.0, 60.0/60.0, | 100.0/100.0, 100.0/91.3, 100.0/100.0, 100.0/100.0, | 100.0/100.0, 95.2/87.0, 100.0/100.0, 100.0/100.0, |
|                 |              |                                                 |                                               |                                                    |                                                   |
|                 |              | 94.3/100.0, 92.7/100.0, 100.0/100.0, 71.4/71.4, | 71.4/100.0, 75.6/100.0, 85.7/85.7, 14.3/14.3, | 68.6/100.0, 68.3/96.6, 85.7/85.7, 42.9/42.9,       | 71.4/100.0, 73.2/100.0, 85.7/85.7, 42.9/42.9,     |
|                 |              |                                                 |                                               |                                                    |                                                   |
|                 |              | 100.0/100.0, 98.3/100.0, 100.0/92.3, 83.3/76.9, | 60.9/100.0, 63.8/100.0, 16.7/28.6, 0.0/0.0,   | 82.6/100.0, 79.3/97.9, 75.0/75.0, 41.7/41.7,       | 84.8/100.0, 86.2/100.0, 75.0/75.0, 41.7/41.7,     |
|                 |              |                                                 |                                               |                                                    |                                                   |
|                 |              | 87.5/87.5, 95.0/95.0, 80.0/80.0, 60.0/60.0,     | 75.0/75.0, 75.0/75.0, 20.0/50.0, 0.0/0.0,     | 93.8/78.9, 95.0/82.6, 80.0/80.0, 60.0/60.0,        | 93.8/78.9, 95.0/82.6, 80.0/80.0, 60.0/60.0,       |
|                 |              |                                                 |                                               |                                                    |                                                   |
|                 |              | 96.6/100.0, 97.1/100.0, 100.0/100.0, 83.3/83.3, | 65.5/86.4, 67.6/85.2, 50.0/100.0, 0.0/0.0,    | 86.2/100.0, 79.4/93.1, 83.3/100.0, 66.7/80.0,      | 93.1/100.0, 94.1/100.0, 83.3/100.0, 66.7/80.0,    |

Figure 1. More qualitative and quantitative evaluations.

| Processed Input | Ground Truth | FloorNet                                                                                           | Ours<br>(w/o $E_{data}$ , $E_{consis}$ )          | Ours<br>(w/o $E_{consis}$ )                        | Ours                                               |
|-----------------|--------------|----------------------------------------------------------------------------------------------------|---------------------------------------------------|----------------------------------------------------|----------------------------------------------------|
|                 |              |                                                                                                    |                                                   |                                                    |                                                    |
|                 |              | 88.0/73.3, 84.8/75.7,<br>77.8/87.5, 44.4/50.0,                                                     | 92.0/85.2, 90.9/88.2,<br>77.8/87.5, 33.3/37.5,    | 96.0/82.8, 93.9/83.8,<br>100.0/100.0, 100.0/100.0, | 92.0/85.2, 93.9/88.6,<br>100.0/100.0, 100.0/100.0, |
|                 |              |                                                                                                    |                                                   |                                                    |                                                    |
|                 |              | 85.0/100.0, 91.7/100.0, 80.0/100.0, 83.3/100.0,<br>100.0/100.0, 60.0/60.0, 100.0/100.0, 60.0/60.0, | 85.0/100.0, 79.2/95.0,<br>100.0/100.0, 60.0/60.0, | 85.0/100.0, 79.2/95.0,<br>100.0/100.0, 60.0/60.0,  | 75.0/100.0, 70.8/94.4,<br>100.0/100.0, 60.0/60.0,  |
|                 |              |                                                                                                    |                                                   |                                                    |                                                    |
|                 |              | 82.9/100.0, 83.7/100.0,<br>88.9/100.0, 44.4/50.0,                                                  | 85.7/93.8, 86.0/84.1,<br>77.8/70.0, 22.2/22.2,    | 85.7/100.0, 79.1/91.9,<br>88.9/88.9, 44.4/44.4,    | 85.7/100.0, 81.4/94.6,<br>88.9/88.9, 44.4/44.4,    |
|                 |              |                                                                                                    |                                                   |                                                    |                                                    |
|                 |              | 91.2/93.9, 92.5/90.2,<br>100.0/77.8, 28.6/22.2,                                                    | 76.5/100.0, 72.5/85.3,<br>57.1/66.7, 0.0/0.0,     | 79.4/96.4, 75.0/88.2,<br>85.7/85.7, 57.1/57.1,     | 79.4/96.4, 75.0/88.2,<br>85.7/85.7, 57.1/57.1,     |

Figure 1. More qualitative and quantitative evaluations.
